# Supplementary material for: One size fits all? Mixed methods evaluation of the impact of 100% single-room accommodation on staff and patient experience, safety and costs
Source: PubMed Central journal article supplement (PMC4819646; doi:10.1136/bmjqs-2015-004265), 2015-09-25
Supplement: bmjqs-2015-004265-s1.pdf [file bmjqs-2015-004265-s1.pdf]

## SUPPLEMENTARY APPENDIX

### Organisational context key stakeholder interviews

**Table 7: Number of key stakeholder interviews, sampling and topics**

| <b>Phase</b>                        | <b>Senior trust staff</b> | <b>New hospital development team</b> | <b>PFI consortium</b> | <b>Senior Medical and AHP staff</b> | <b>Ward managers/administrator</b> | <b>Sampling</b>        | <b>Topics</b>                                                                                                   |
|-------------------------------------|---------------------------|--------------------------------------|-----------------------|-------------------------------------|------------------------------------|------------------------|-----------------------------------------------------------------------------------------------------------------|
| Pre move (n=20)                     | 8                         | 9                                    | 3                     |                                     |                                    | Purposive, snowballing | Factors influencing decision to build<br>Management of change process<br>Perceived advantages and disadvantages |
| Post move (n=21 + 5 in focus group) | 8                         |                                      |                       | 8 + 5 in mini focus group           | 5                                  | Purposive, snowballing | Implementation<br>Early challenges<br>Experience across the trust                                               |

## Details of case study methods and samples

### 1. Observation of practice

**Table 8: Numbers of staff observed and hours of observation by ward and staff type pre and post move**

| Staff group           | Phase | Hours observation (no. staff shown in brackets) |                               |                             |                             | Total                        |
|-----------------------|-------|-------------------------------------------------|-------------------------------|-----------------------------|-----------------------------|------------------------------|
|                       |       | <i>Acute assessment</i>                         | <i>Medical (older people)</i> | <i>Surgical</i>             | <i>Maternity</i>            |                              |
| Nurses/midwives       | Pre   | 23<br>(3)                                       | 13.5 (2)                      | 19.25<br>(3)                | 14.75<br>(3)                | <b>70.5</b><br><b>(11)</b>   |
| Nurses/midwives       | Post  | 27.4<br>(5)                                     | 23.2<br>(4)                   | 23.2<br>(4)                 | 22<br>(4)                   | <b>95.8</b><br><b>(17)</b>   |
| Healthcare assistants | Pre   | 6<br>(1)                                        | 15.25<br>(2)                  | 12.5<br>(2)                 | 14.5<br>(3)                 | <b>48.25</b><br><b>(8)</b>   |
| Healthcare assistants | Post  | 5.6<br>(1)                                      | 8.5<br>(2)                    | 10.5<br>(2)                 | 11.2<br>(2)                 | <b>35.81</b><br><b>(7)</b>   |
| <b>Total</b>          |       | <b>62</b><br><b>(10)</b>                        | <b>60.45</b><br><b>(10)</b>   | <b>65.45</b><br><b>(11)</b> | <b>62.45</b><br><b>(12)</b> | <b>250.36</b><br><b>(43)</b> |

### Box 1. Task activity categories

1. Direct care
2. Documentation
3. Escort/transfer patient
4. Indirect care
5. Medication tasks
6. Personal/social
7. Professional communication
8. Ward related

## 2. Staff travel distances

**Table 9: Pedometer data collection by staff type, ward and pre and post move**

| Staff group           | Phase      | Hours pedometer data (no. staff shown in brackets) <sup>1</sup> |                               |                           |                           | Total                      |
|-----------------------|------------|-----------------------------------------------------------------|-------------------------------|---------------------------|---------------------------|----------------------------|
|                       |            | <i>Acute assessment</i>                                         | <i>Medical (older people)</i> | <i>Surgical</i>           | <i>Maternity</i>          |                            |
| Nurses/midwives       | Pre        | 111<br>(11)                                                     | 54<br>(5)                     | 74<br>(8)                 | 40<br>(5)                 | <b>279</b><br><b>(29)</b>  |
|                       | Post       | 58<br>(9)                                                       | 27<br>(7)                     | 59<br>(8)                 | 33<br>(6)                 | <b>177</b><br><b>(30)</b>  |
| Healthcare assistants | Pre        | 30<br>(1)                                                       | 118<br>(11)                   | 49<br>(6)                 | 39<br>(6)                 | <b>236</b><br><b>(24)</b>  |
|                       | Post       | 24<br>(5)                                                       | 62<br>(12)                    | 54<br>(7)                 | 11<br>(2)                 | <b>151</b><br><b>(26)</b>  |
| Total                 | Pre        | 141<br>(12)                                                     | 171<br>(16)                   | 123<br>(14)               | 79<br>(11)                | <b>514</b><br><b>(53)</b>  |
|                       | Post       | 81<br>(14)                                                      | 89<br>(19)                    | 113<br>(15)               | 46<br>(8)                 | <b>328</b><br><b>(56)</b>  |
| <b>Grand total</b>    | <b>All</b> | <b>222</b><br><b>(26)</b>                                       | <b>260</b><br><b>(35)</b>     | <b>236</b><br><b>(29)</b> | <b>124</b><br><b>(19)</b> | <b>842</b><br><b>(109)</b> |

## 3. Staff surveys

**Table 10: Staff pre and post move survey components**

| Scale                                                                                                                                               | Format                | Number of items |
|-----------------------------------------------------------------------------------------------------------------------------------------------------|-----------------------|-----------------|
| Adapted Teamwork and Safety Climate Survey (Hutchinson et al, 2006)                                                                                 | Likert scales         | 24              |
| Perceptions of <b>current</b> ward layout, environment, facility and information communications technology                                          | 5 point Likert scales | 35              |
| Improvements needed to <b>current</b> environment                                                                                                   | Open ended            | 2               |
| <b>Perceptions</b> of single rooms vs multi-bed accommodation – in relation to facilities and for various staff and patient activities <sup>1</sup> | 5 point Likert scales | 23              |
| Most looked forward to/most liked and least looked forward to/least liked                                                                           | Open ended            | 2               |

|                                                         |                                     |         |
|---------------------------------------------------------|-------------------------------------|---------|
| features of 100% single rooms <sup>2</sup>              |                                     |         |
| Preference for ward layout <sup>1</sup>                 | Categorical                         | 1       |
| Most recent shift activities and satisfaction with care | 5 point Likert scale<br>Categorical | 18<br>9 |
| Job satisfaction                                        | 5 point Likert scale                | 1       |
| Well being and stress                                   | Categorical<br>Likert scale         | 5<br>3  |
| Demographic                                             | Categorical                         | 10      |

<sup>1</sup>**Note:** Questions about perceptions of single vs multi bedded wards were asked pre and post move

<sup>2</sup> **Note:** Pre move questions were about most and least looked forward to features of single rooms. Post move questions were about the most and least liked features

**Table 11: Survey response rate before and after the move**

| Phase     | Total population sampled | Response rate |
|-----------|--------------------------|---------------|
| Pre move  | 176                      | 31%           |
| Post move | 204                      | 27%           |

**Table 12: Number of survey respondents by ward**

| Phase     | Ward      |         |                   |                  | Total |
|-----------|-----------|---------|-------------------|------------------|-------|
|           | Maternity | Surgery | Older people care | Acute Assessment |       |
| Pre Move  | 17        | 15      | 11                | 12               | 55    |
| Post Move | 26        | 14      | 11                | 4                | 55    |
| Total     | 43        | 29      | 22                | 16               | 110   |

**Table 13: Number of survey respondents by staff type**

| Phase     | Healthcare assistants | Registered nurses/midwives | Total |
|-----------|-----------------------|----------------------------|-------|
| Pre Move  | 16                    | 39                         | 55    |
| Post Move | 16                    | 39                         | 55    |
| Total     | 32                    | 78                         | 110   |

#### 4. Staff interviews

##### Box 2. Interview topics

|                                                              |
|--------------------------------------------------------------|
| Staff experience – working differently / new ways of working |
| Ward layout including layout of single rooms and en suites   |
| Staff communication and teamwork                             |
| Perceptions of patient experience                            |

**Table 14: Numbers of staff interviewed by staff group and pre and post move**

| Staff group           | Phase      | Staff interviews (photo elicitation in brackets) |                               |                         |                         | Total                    |
|-----------------------|------------|--------------------------------------------------|-------------------------------|-------------------------|-------------------------|--------------------------|
|                       |            | <i>Acute assessment</i>                          | <i>Medical (older people)</i> | <i>Surgical</i>         | <i>Maternity</i>        |                          |
| Nurses/midwives       | Pre        | 5<br>(3)                                         | 2<br>(2)                      | 4<br>(2)                | 5<br>(3)                | <b>16</b><br><b>(10)</b> |
|                       | Post       | 5<br>(3)                                         | 3<br>(1)                      | 6<br>(3)                | 5<br>(2)                | <b>19</b><br><b>(9)</b>  |
| Healthcare assistants | Pre        | 1<br>(0)                                         | 4<br>(1)                      | 2<br>(1)                | 1<br>(0)                | <b>8</b><br><b>(2)</b>   |
|                       | Post       | 1<br>(0)                                         | 2<br>(1)                      | 1<br>(1)                | 1<br>(1)                | <b>5</b><br><b>(3)</b>   |
| Total                 | Pre        | 6<br>(3)                                         | 6<br>(3)                      | 6<br>(3)                | 6<br>(3)                | <b>24</b><br><b>(12)</b> |
|                       | Post       | 6<br>(3)                                         | 5<br>(2)                      | 7<br>(4)                | 6<br>(3)                | <b>24</b><br><b>(12)</b> |
| <b>Grand total</b>    | <b>All</b> | <b>12</b><br><b>(6)</b>                          | <b>11</b><br><b>(5)</b>       | <b>13</b><br><b>(7)</b> | <b>12</b><br><b>(6)</b> | <b>48</b><br><b>(24)</b> |

#### 5. Patient interviews

##### Box 3. Patient interview topics

|                                |
|--------------------------------|
| Recent experience as a patient |
| Experience of being admitted   |
| Feeling comfortable            |
| Feeling safe                   |
| Interaction with staff         |
| Interaction with visitors      |
| Suggestions for improvements   |

**Table 15: Numbers of patients interviewed pre move**

| Key characteristics         |             | Case study ward        |                        |                        |               | Total |
|-----------------------------|-------------|------------------------|------------------------|------------------------|---------------|-------|
|                             |             | Acute assessment       | Medical (older people) | Surgical               | Maternity     |       |
| Length of stay (range)      |             | 24-48 hrs              | 2-6 weeks              | 24 hrs -14 days        | 24 hrs 5 days | -     |
| Mean age                    |             | 57 years (range 42-73) | 87 years (range 83-94) | 58 years (range 19-77) | Not collected |       |
| Parity <sup>1</sup>         | Primiparous | -                      | -                      | -                      | 5             |       |
|                             | Multiparous |                        |                        |                        | 5             |       |
| Female                      |             | 3                      | 2                      | 6                      | 10            | 21    |
| Male                        |             | 2                      | 2                      | 7                      | -             | 11    |
| TOTAL (interviews per ward) |             | 5                      | 4                      | 13                     | 10            | 32    |

**Table 16: Numbers of patients interviewed post move**

| Key demographics                   |             | Ward                                 |                        |                          |                        | Total     |
|------------------------------------|-------------|--------------------------------------|------------------------|--------------------------|------------------------|-----------|
|                                    |             | <i>Medical Assessment Unit (MAU)</i> | <i>Older people</i>    | <i>Emergency Surgery</i> | <i>Postnatal</i>       |           |
| Length of stay (range)             |             | 24 hrs – 7 days                      | 6 days – 5 weeks       | 24 hrs – 9 days          | 48 hrs – 7 days        | -         |
| Mean age                           |             | 62 years (range 44-74)               | 82 years (range 70-95) | 66 years (range 45-84)   | 35 years (range 26-49) |           |
| Parity <sup>1</sup>                | Primiparous | NA                                   | NA                     | NA                       | 5                      |           |
|                                    | Multiparous |                                      |                        |                          | 3                      |           |
| Female                             |             | 4                                    | 4                      | 3                        | 8                      | <b>19</b> |
| Male                               |             | 4                                    | 4                      | 5                        | NA                     | <b>13</b> |
| <b>TOTAL (interviews per ward)</b> |             | <b>8<sup>2</sup></b>                 | <b>8</b>               | <b>8</b>                 | <b>8</b>               | <b>32</b> |

## Quasi experimental study of safety outcomes

**Table 17: Characteristics of study wards in intervention and control sites**

|          | Acute Assessment |                     |              | Older People    |                     |              |
|----------|------------------|---------------------|--------------|-----------------|---------------------|--------------|
|          | Tunbridge Wells  | Mixed Accommodation | Steady state | Tunbridge Wells | Mixed Accommodation | Steady state |
| n        | 17457            | 4948                | 24747        | 1600            | 1779                | 1580         |
| Age      | 57.5             | 52.8                | 64.8         | 84.4            | 80.5                | 82.9         |
| LOS      | 1.3              | 1.1                 | 1.5          | 27.4            | 12.9                | 13.8         |
| Charlson | 8.2%             | 4.3%                | 9.5%         | 11.8%           | 4.9%                | 16.5%        |
|          | Surgical         |                     |              |                 |                     |              |
|          | Tunbridge Wells  | Mixed Accommodation | Steady state |                 |                     |              |
| n        | 4938             | 1821                | 8388         |                 |                     |              |
| Age      | 60.7             | 55.0                | 50.2         |                 |                     |              |
| LOS      | 7.2              | 8.1                 | 1.9          |                 |                     |              |
| Charlson | 10.6%            | 9.4%                | 4.1%         |                 |                     |              |

**Table 18: Data sources and definitions for outcomes, matching and risk stratification and staffing variables**

| Variable                            | Source            | Definition                                           |
|-------------------------------------|-------------------|------------------------------------------------------|
| <i>Outcome</i>                      |                   |                                                      |
| Falls                               | Incident Reports  | (Falls per month per ward/bed days)*1000             |
| Pressure Ulcer                      | Incident Reports  | (Pressure ulcers per month per ward/bed days)*1000   |
| Medication error                    | Incident Reports  | (Medication errors per month per ward/bed days)*1000 |
| MRSA                                | Infection Control | (MRSA cases per month per ward/bed days)*1000        |
| Clostridium difficile               | Infection Control | (C. diff. cases per month per ward/bed days)*1000    |
| <i>Matching/Risk stratification</i> |                   |                                                      |
| Age                                 | Administrative    | Mean                                                 |
| Length of stay                      | Administrative    | Mean                                                 |
| Primary ICD-10                      | Administrative    | 10 most frequent 4-digit ICD-10 codes                |
| HRG                                 | Administrative    | 5 most frequent HRG sub groups                       |

|                       |                |                                                        |
|-----------------------|----------------|--------------------------------------------------------|
| Charlson Index        | Administrative | Percentage of diagnoses included in the Charlson index |
| Bed days              | Administrative | Sum of length of stay per month per ward               |
| <i>Staffing</i>       |                |                                                        |
| WTE All nursing staff | Finance        | Total nursing hrs. per patient day (TNHPPD)            |
| WTE Registered Nurses | Finance        | Total registered nursing hrs. per patient day (RNHPPD) |
| WTE Temporary Staff   | Finance        | Temporary nursing hrs. per patient day (TempHPPD)      |

## Economic analysis

**Table 19: Data sources for economic analysis**

| Data                                         | Source                                                                                                                                                                                                                                                                                                                                                                  |
|----------------------------------------------|-------------------------------------------------------------------------------------------------------------------------------------------------------------------------------------------------------------------------------------------------------------------------------------------------------------------------------------------------------------------------|
| Construction and operating/maintenance costs | Literature<br>outline business case for new hospital<br>Expert views gathered during interviews<br>healthcare premises cost guides<br>Estate Return Information Collection data over a sample of hospitals<br>Net Present Value of construction costs and lifecycle operating costs discounted 3.5% over the first 30 years and a 3% for the next 30 years to 60 years. |
| Cleaning costs                               | Administrative data – three different designs – 100% single rooms, 50% single rooms, 100% multi bedded room – assuming equal numbers of patients                                                                                                                                                                                                                        |
| Cost of nurse staffing                       | Actual monthly WTE for each case study ward<br>Royal College of Nursing data on pay rates to calculate average of all pay scales in each band<br>Data on unit cost of health and social care                                                                                                                                                                            |
| Extra nursing time                           | Time spent in direct contact with patients (observational data)<br>The proportion of contact time was applied to the total nurse hours per patient days (NHPPD) to provide an estimate of the patients contact time per patient day                                                                                                                                     |

**Table 20: Experts interviewed**

|                                    |   |
|------------------------------------|---|
| Construction management            | 2 |
| Architectural design in healthcare | 4 |
| Strategic estate advisor           | 1 |



|                                |   |
|--------------------------------|---|
| Hospital facilities management | 3 |
| Nursing management             | 1 |
| Hospital finance management    | 1 |
